# Supplementary material
Source: publisher site journal article supplement (https://www.spandidos-publications.com/8324/downloadSupplementary)
Supplement: Supplementary file 1 [file downloadSupplementary]

Table SI. Baseline characteristics of participants in this study.

| Characteristic                                  | Non-CRC<br>(n=36,809)        | CRC (n=282)               | P-value |
|-------------------------------------------------|------------------------------|---------------------------|---------|
| Smoking                                         |                              |                           | <0.0001 |
| No smoking                                      | 6,532 (18.8; 17.7, 19.9)     | 43 (15.5; 11.2, 20.9)     |         |
| Past smoking                                    | 9,335 (24.9; 24.2, 25.7)     | 128 (45.4; 37.7, 53.3)    |         |
| Current smoking                                 | 7,988 (22.2; 21.4, 23.1)     | 41 (15.1; 10.7, 20.7)     |         |
| Secondhand smoking                              | 12,954 (34.1; 33.2, 34.9)    | 70 (24.1; 17.2, 32.8)     |         |
| Cotinine, ng/ml                                 |                              |                           | 0.0260  |
| <0.015                                          | 7,676 (23.4; 22.0, 24.8)     | 67 (29.2; 22.3, 37.3)     |         |
| 0.015-3                                         | 17,876 (48.5; 47.5, 49.5)    | 139; (51.5; 43.5, 59.5)   |         |
| 3-10                                            | 626 (1.6; 1.5, 1.8)          | 3 (0.7; 0.2, 2.5)         |         |
| ≥10                                             | 8,987 (26.5; 25.4, 27.5)     | 44 (18.5; 13.7, 24.6)     |         |
| Age started smoking cigarettes regularly, years |                              |                           | 0.4124  |
| Never regular                                   | 809 (5.15; 4.69, 5.66)       | 7 (4.79; 1.72, 12.64)     |         |
| <20                                             | 12,045 (71.95; 71.06, 72.82) | 108 (66.81; 58.33, 74.32) |         |
| ≥20                                             | 4,412 (22.90; 22.13, 23.69)  | 53 (28.40; 21.45, 36.56)  |         |
| Age, years                                      | 36,809 (46.8; 46.4, 47.2)    | 282 (68.3; 66.3, 70.3)    | <0.0001 |
| Sex                                             |                              |                           | 0.1532  |
| Male                                            | 18,550 (49.4; 48.9, 49.9)    | 146 (44.4; 37.7, 51.4)    |         |
| Female                                          | 18,259 (50.6; 50.1, 51.1)    | 136 (55.6; 48.6, 62.3)    |         |
| Ethnicity                                       |                              |                           | <0.0001 |
| Mexican-American                                | 6,341 (7.6; 6.5, 8.7)        | 15 (1.3; 0.6, 2.7)        |         |
| Non-Hispanic White                              | 17,351 (70.9; 68.7, 73.0)    | 192 (84.4; 79.9, 88.1)    |         |
| Non-Hispanic Black                              | 7,500 (10.5; 9.4, 11.8)      | 56 (9.5; 7.1, 12.7)       |         |
| Other Hispanic                                  | 2,844 (5.1; 4.3, 6.1)        | 13 (2.5; 1.2, 5.3)        |         |
| Other ethnicities                               | 2,773 (5.9; 5.4, 6.5)        | 6 (2.2; 0.6, 7.4)         |         |
| Education                                       |                              |                           | 0.0972  |
| Less than high school                           | 9,710 (16.9; 15.9, 17.9)     | 89 (21.6; 16.7, 27.3)     |         |
| High school grad/GED or equivalent              | 8,557 (23.7; 22.8, 24.6)     | 63 (19.2; 14.1, 25.7)     |         |
| More than high school                           | 18,542 (59.4; 57.8, 60.9)    | 130 (59.2; 51.7, 66.3)    |         |
| Marital status                                  |                              |                           | 0.1020  |
| Married/living with partner                     | 22,211 (64.1; 63.0, 65.2)    | 149 (58.9; 52.2, 65.3)    |         |
| Widowed/divorced/separated/never married        | 14,598 (35.9; 34.8, 37.0)    | 133 (41.1; 34.7, 47.8)    |         |
| RIP                                             |                              |                           | 0.0032  |
| 0-1.00                                          | 7,466 (13.9; 13.0, 14.8)     | 50 (13.7; 9.8, 18.9)      |         |
| 1.01-3.00                                       | 15,427 (36.0; 34.9, 37.1)    | 142 (46.8; 39.5, 54.2)    |         |

|                        |                              |                        |        |
|------------------------|------------------------------|------------------------|--------|
| >3.00                  | 13,916 (50.1; 48.4,<br>51.7) | 90 (39.5; 32.3, 47.1)  |        |
| Alcohol consumption    |                              |                        | 0.9949 |
| No                     | 5,225 (11.3; 10.4,<br>12.3)  | 35 (11.4; 7.5, 16.9)   |        |
| Yes                    | 31,584 (88.7; 87.7,<br>89.6) | 247 (88.6; 83.1, 92.5) |        |
| BMI, kg/m <sup>2</sup> |                              |                        | 0.1807 |
| <18.50                 | 565 (1.6; 1.5, 1.8)          | 2 (0.2; 0.0, 0.8)      |        |
| 18.50-24.99            | 10,450 (30.0; 29.2,<br>30.9) | 66 (26.7; 20.9, 33.5)  |        |
| 25.00-29.99            | 12,479 (33.4; 32.7,<br>34.1) | 109 (35.6; 28.4, 43.4) |        |
| ≥30.00                 | 13,315 (34.9; 34.1,<br>35.8) | 105 (37.6; 30.6, 45.1) |        |

---

Continuous data are presented as the number of individuals (survey-weighted mean; 95% CI), and the P-values were determined by survey-weighted linear regression. Categorical data are presented as the number of individuals (survey-weighted percentage; 95% CI), and the P-value were determined by survey-weighted  $\chi^2$  test. BMI, body mass index; CI, confidence interval; CRC, colorectal cancer; GED, General Educational Development; RIP, ratio of family income to poverty.

---

Table SII. Details of the GWAS data analyzed in the Mendelian randomization.

| A, Finngen (C3_COLORECTAL_EXALLC) data                                      |             |             |                |                  |            |            |
|-----------------------------------------------------------------------------|-------------|-------------|----------------|------------------|------------|------------|
| Phenotype                                                                   | Sample size | No. of SNPs | R <sup>2</sup> | Cochran's Q test | MR PRES SO | Pleiotropy |
| Colorectal cancer                                                           | 293,646     | -           | -              | -                | -          | -          |
| B Meta-analysis data                                                        |             |             |                |                  |            |            |
| Phenotype                                                                   | Sample size | No. of SNPs | R <sup>2</sup> | Cochran's Q test | MR PRES SO | Pleiotropy |
| Age of initiation of regular smoking                                        | 341,427     | 8           | 0.12 %         | 0.368            | 0.513      | 0.771      |
| Cigarettes per day                                                          | 337,334     | 52          | 1.41 %         | 0.982            | 0.977      | 0.676      |
| Smoking cessation                                                           | 547,219     | 21          | 0.93 %         | 0.663            | 0.668      | 0.711      |
| Smoking initiation                                                          | 1,232,091   | 331         | 5.10 %         | 0.088            | 0.104      | 0.289      |
| C, ukb-b-7460 data (IEU database)                                           |             |             |                |                  |            |            |
| Phenotype                                                                   | Sample size | No. of SNPs | R <sup>2</sup> | Cochran's Q test | MR PRES SO | Pleiotropy |
| Pack years of adult smoking as a proportion of life span exposed to smoking | 142,387     | 13          | 0.59 %         | 0.831            | 0.868      | 0.607      |

GWAS, genome-wide association studies; SNP, single-nucleotide polymorphisms.

Table SIII. Target sequences of shRNAs and siRNAs.

| Name        | Target sequence                                                        |
|-------------|------------------------------------------------------------------------|
| shCKAP2L #1 | 5'-CCACCTTCTAAATCTACTATT-3'                                            |
| shCKAP2L #2 | 5'-GCAGCAGTTAACAGATCAAGG-3'                                            |
| shCKAP2L #3 | 5'-GCAGATTTAATTCAGCCATTC-3'                                            |
| shCKAP2L #4 | 5'-CTATATGAAGAGGCCATTAAA-3'                                            |
| shNC        | 5'-GCTTCGCGCCGTAGTCTTA-3'                                              |
| siAREG      | Sense: 5'-CUUCGACAAGAGAAUGGAA-3'<br>Antisense: 5'-UCCAUCUCUUGUCGAAG-3' |
| siNC        | Sense: 5'-UUCUCCGAACGUGUCACGU-3'                                       |
| siNC        | Antisense: 5'-ACGUGACACGUUCGGAGAA-3'                                   |

AREG, amphiregulin; CKAP2L, cytoskeleton-associated protein 2-like; NC, negative control; shRNA, short hairpin RNA; siRNA, small interfering RNA.

Table SIV. Primer sequences used for reverse transcription-quantitative PCR.

| Primer         | Sequence, 5'-3'            |
|----------------|----------------------------|
| CKAP2L         | F: ACAGAACCACAGAAGGGATTACT |
|                | R: CACTTCCGGCATCCCATTATTC  |
| $\beta$ -actin | F: CCTTCCTGGGCATGGAGTC     |
|                | R: TGATCTTCATTGTGCTGGGTG   |
| AREG           | F: CTGCCTTTATGTCTGCTGTGATC |
|                | R: CGTTCCTCAGCTTCTCCTTCATA |
| ChIP (AREG)    | F: TGTGCGAACGTCTGTAGGG     |
|                | R: GTTTAAGTTCCACTTCTCTCAGC |

AREG, amphiregulin; ChIP, chromatin immunoprecipitation; CKAP2L, cytoskeleton-associated protein 2-like; F, forward; R, reverse.

Table SV. Primary antibodies used for western blotting.

| Antibody             | Cat. no.   | Dilution | Supplier                                   |
|----------------------|------------|----------|--------------------------------------------|
| Anti-CKAP2L          | 17143-1-AP | 1:1,000  | Proteintech Group, Inc.                    |
| Anti-p-STAT3         | ET1607-39  | 1:1,000  | HUABIO                                     |
| Anti-EGFR            | T55112     | 1:5,000  | Abmart Pharmaceutical Technology Co., Ltd. |
| Anti-p-EGFR          | T55232     | 1:500    | Abmart Pharmaceutical Technology Co., Ltd. |
| Anti-cyclin A2       | ET1612-26  | 1:1,000  | HUABIO                                     |
| Anti-cyclin B1       | ET1608-27  | 1:5,000  | HUABIO                                     |
| Anti-cyclin D1       | ET1601-31  | 1:5,000  | HUABIO                                     |
| Anti-CDK1            | ET1607-51  | 1:1,000  | HUABIO                                     |
| Anti-CDK2            | ET1602-6   | 1:1,000  | HUABIO                                     |
| Anti-E-cadherin      | ET1607-75  | 1:5,000  | HUABIO                                     |
| Anti-N-cadherin      | ET1607-37  | 1:2,000  | HUABIO                                     |
| Anti-Vimentin        | ET1610-39  | 1:20,000 | HUABIO                                     |
| Anti-STAT3           | 60199-1-Ig | 1:300    | Proteintech Group, Inc.                    |
| Anti- $\beta$ -actin | 20536-1-AP | 1:5,000  | Proteintech Group, Inc.                    |

CKAP2L, cytoskeleton-associated protein 2-like; EGFR, epidermal growth factor receptor; p-, phosphorylated; STAT3, signal transducer and activator of transcription 3.
